# Supplementary material
Source: Springer Nature journal article supplement (https://www.springermedizin.de/resource/supplementary/12889_2011_4321_MOESM1_ESM.pdf/9491754)

### Alleviation of pain and symptoms (APS)

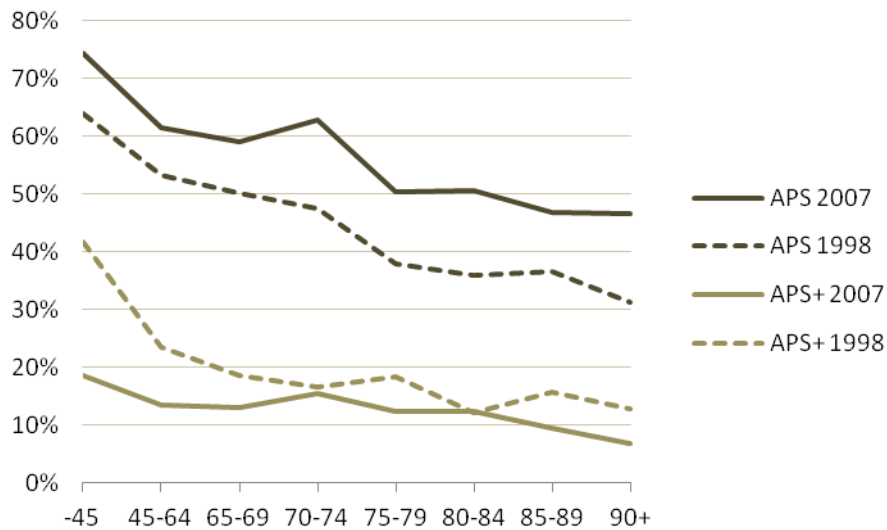

### Non-treatment decisions (NTD)

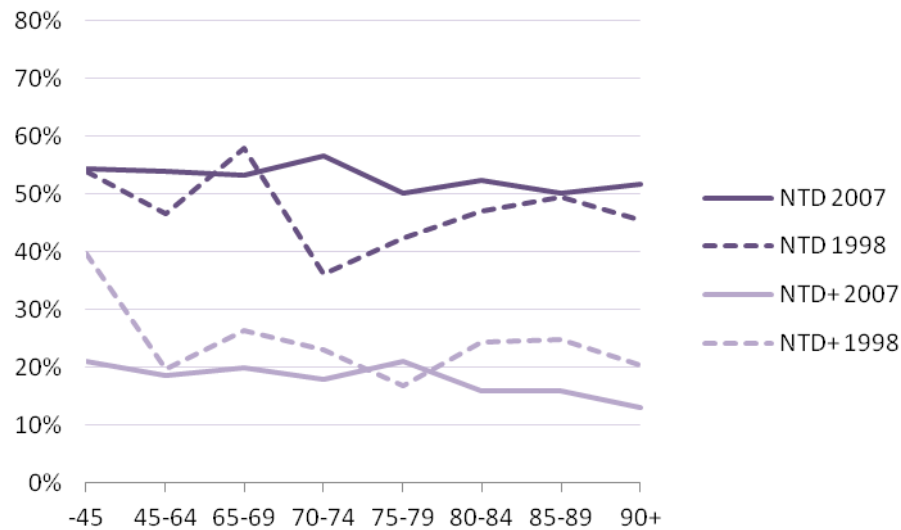

### Euthanasia/assisted suicide (EAS)

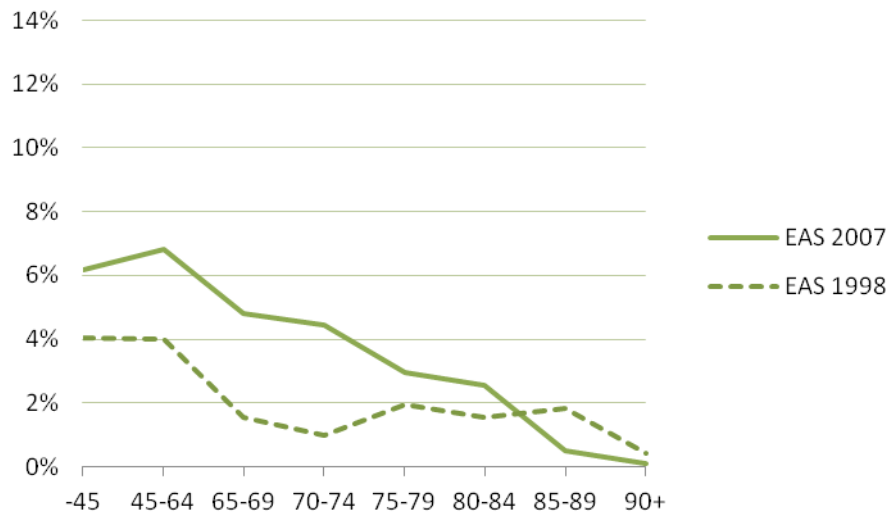

### Life-ending acts without explicit request (LAWER)

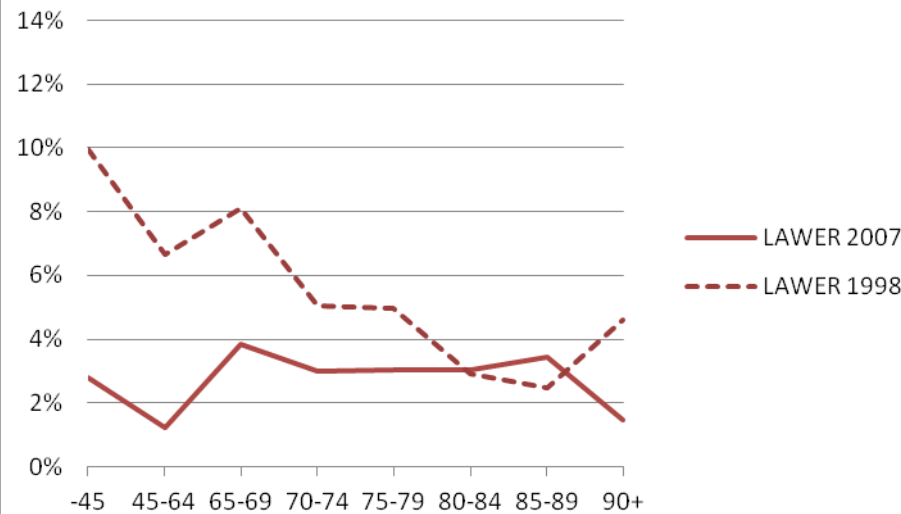

Supplement: MOESM1 [file 9491754]
